# Supplementary material
Source: publisher site journal article supplement (https://www.dovepress.com/article/427658)
Supplement: Supplementary file 1 [file get_supplementary_file.php]

**Table S1 Top 10 Journals ordered by H-index**

| **Element** | **h_index** | **m_index** | **TC** | **NP** | **PY_start** | **IF** |
| --- | --- | --- | --- | --- | --- | --- |
| Brain Stimulation | 15 | 0,938 | 1076 | 27 | 2008 | 9.184 |
| Journal of Pain | 14 | 0,875 | 1018 | 22 | 2008 | 5.383 |
| Pain | 12 | 0,667 | 1055 | 15 | 2006 | 7.926 |
| Clinical Journal of Pain | 10 | 0,625 | 452 | 13 | 2008 | 3.423 |
| Clinical Neurophysiology | 10 | 0,625 | 1360 | 12 | 2008 | 4.861 |
| Frontiers in Human Neuroscience | 9 | 0,818 | 447 | 15 | 2013 | 3.473 |
| Pain Medicine | 9 |  | 196 | 17 |  | 3.637 |
| European Journal of Pain | 8 | 0,667 | 243 | 10 | 2012 | 3.651 |
| Neuroscience Letters | 8 | 0,667 | 265 | 14 | 2012 | 3.197 |
| Plos One | 8 | 0,667 | 231 | 10 | 2012 | 3.752 |

**Abbreviations:**NP, number of publications; h-index, the largest number h such that at least h articles in that journal were cited at least h times each; m-index, h-index divided to the number of years since the first publication; TC, total citations; PY start, publication year of start; IF, impact factor, number of citations divided to number of published articles in a period of time.

**Table S2. Most local cited authors**

| **Author** | **Local Citations** |
| --- | --- |
| FREGNI F | 1723 |
| NITSCHE MA | 665 |
| PASCUAL-LEONE A | 649 |
| BOGGIO PS | 595 |
| PAULUS W | 538 |
| ANTAL A | 459 |
| FREEDMAN SD | 435 |
| BIKSON M | 434 |
| LEFAUCHEUR JP | 383 |
| FERREIRA MJL | 382 |


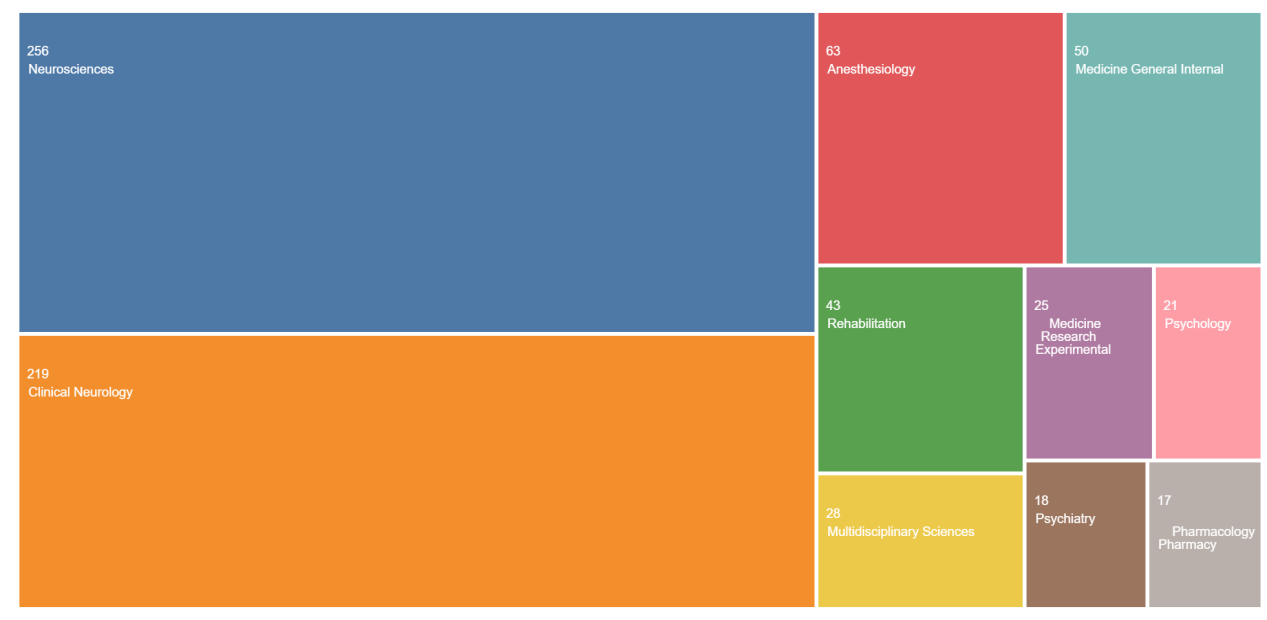


**Figure S1.** Top 10 categories in Web of Science Database.


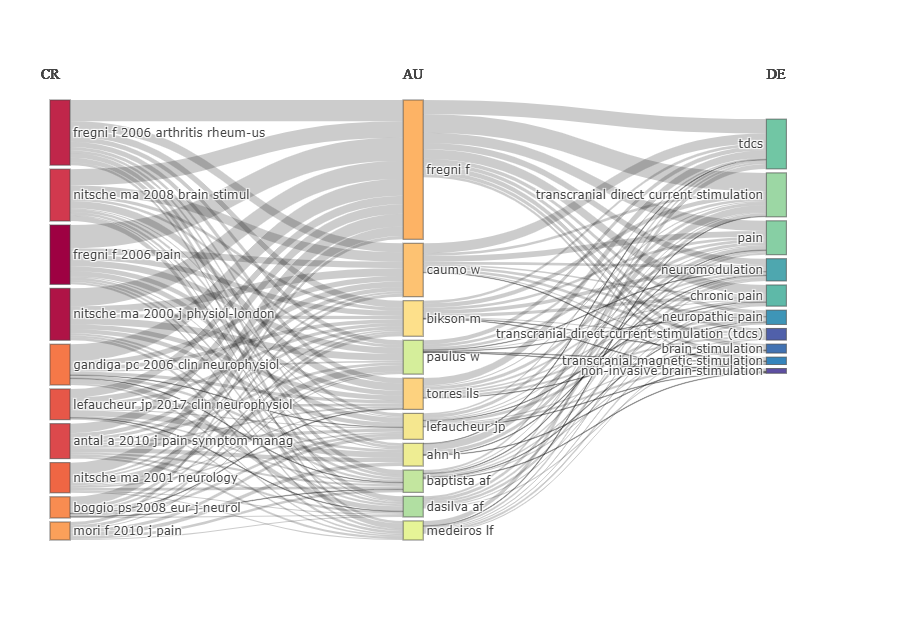
**Figure S2.** Three field plot.

**Abbreviations:**AU- authors, DE- top keywords, CR- Citation references.
